# Supplementary material for: ZnS/CuS nanotubes for visible light-driven photocatalytic hydrogen generation
Source: Royal Society of Chemistry journal article supplement (doi:10.1039/c6ra17046c), 2016-01-01
Supplement: c6ra17046c1.pdf [file c6ra17046c1.pdf]

## ZnS/CuS nanotubes for visible light-driven photocatalytic hydrogen generation

Yi-Biao Shao, Long-Hao Wang, Jian-Hua Huang

Department of Chemistry, Zhejiang Sci-Tech University, Hangzhou 310018, China

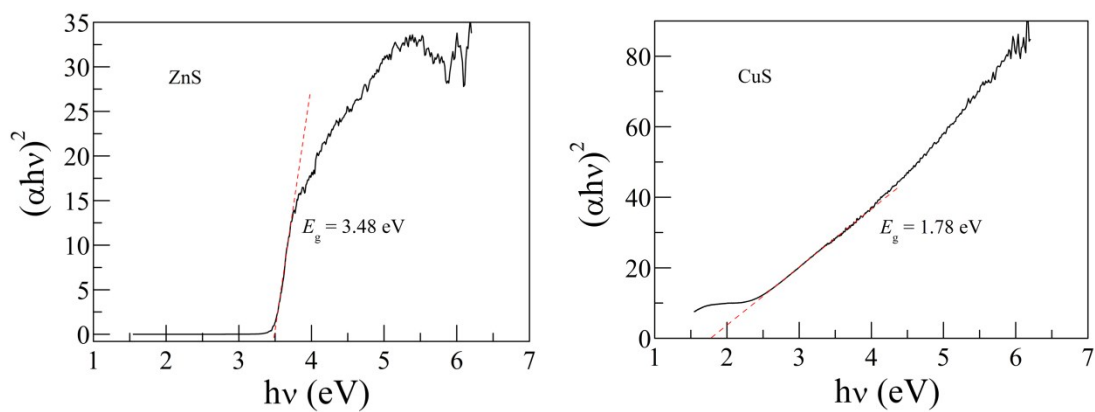

Fig. S1 Tauc plot of ZnS and CuS.
